# Supplementary material for: D-PLACE: A Global Database of Cultural, Linguistic and Environmental Diversity
Source: PubMed Central journal article supplement (PMC4938595; doi:10.1371/journal.pone.0158391), 2016-07-08

**S2 Figure. Database structure.** Boxes in the schema below represent tables in the relational database.

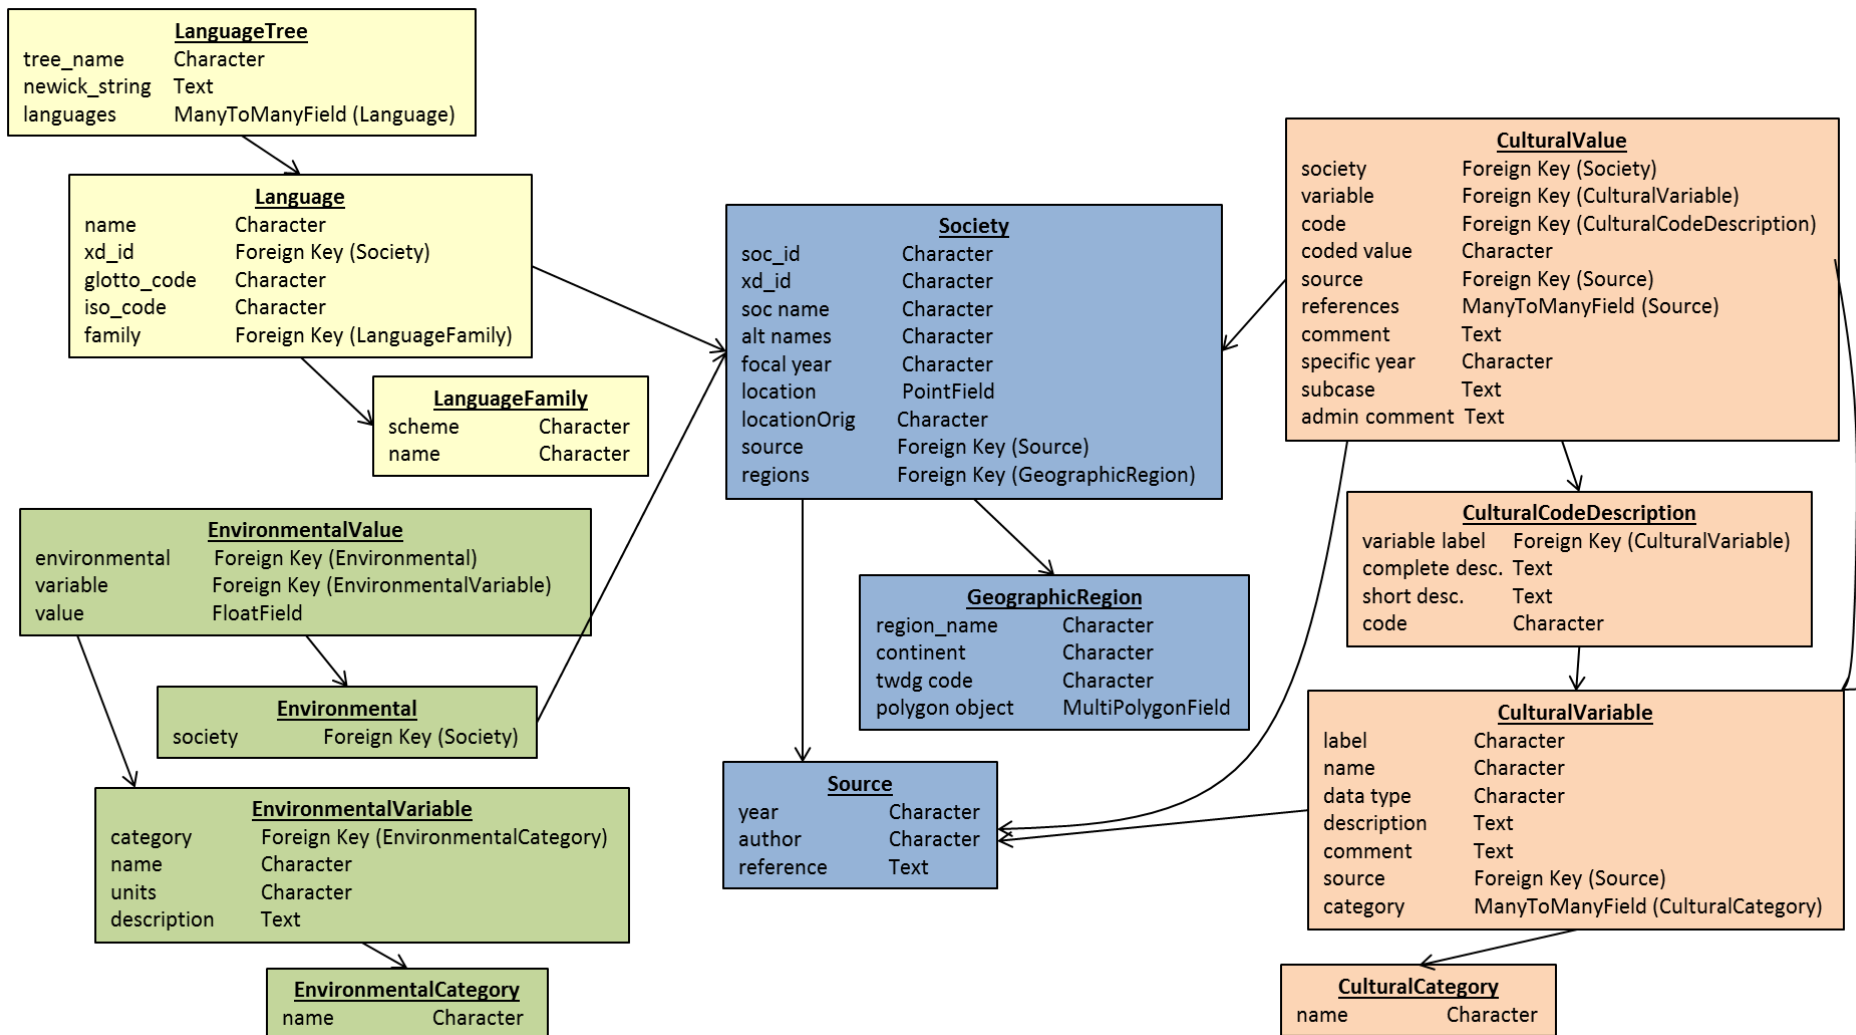

Supplement: pone.0158391.s001.pdf [file pone.0158391.s001.pdf]
