# Supplementary material for: D-PLACE: A Global Database of Cultural, Linguistic and Environmental Diversity
Source: PubMed Central journal article supplement (PMC4938595; doi:10.1371/journal.pone.0158391), 2016-07-08
Supplement: pone.0158391.s002.pdf [file pone.0158391.s002.pdf]

## 1 **S1 Supporting information: D-PLACE data and sources**

### 2 **Ethnographic Atlas data**

3 The data were drawn from tables of coded cultural data published in twenty-nine installments in  
4 the journal *Ethnology* by George P. Murdock [1,2]. We scanned, digitized and compiled the data  
5 in these original publications, ensuring that each society was represented by the latest  
6 correction to its respective data (for a summary of publication and correction dates by society,  
7 see [3]). We then converted Murdock's letter codes and variables to those used by Gray [3]. We  
8 chose to use the Gray codes and variable numbers for two reasons. First, they make it easier to  
9 manage linked codes (Murdock's codes frequently include code "modifiers," in the form of a  
10 prefix and/or suffix (e.g., bVu, where V codes the main state, and b and u code 'alternative'  
11 states—in this case the capital letter is the main rule of marital residence, the preposited letter is  
12 the residence pattern early in the marriage and the postposited letter is a frequent alternative  
13 form). For the most part, these modifiers were transformed into stand-alone variables in Gray [3]  
14 (in this case breaking the single variable for marital residence into three, describing either the  
15 early, dominant, or alternate pattern for marital residence). Second, this process allowed us to  
16 identify errors introduced by the scanning and optical character recognition process by checking  
17 our digitized dataset against that of Gray [3]. Any mismatches were manually checked, and  
18 Murdock's entry used where a discrepancy with Gray [3] was not explained by the  
19 scanning/digitizing process. Any changes to the original data are carefully noted and explained  
20 in a "change" column associated with each variable.

21

22 Gray's [3] "Corrected Ethnographic Atlas" represented a leap forward in terms of the  
23 accessibility of the EA, and has formed the basis for many hundreds of papers in the field of

24 cross-cultural analysis. We have made a small number of changes to the societies, variables  
25 and codes in Gray [3], which we briefly outline here.

26  
27 **Societies:** First, we deleted all data for three societies from Gray [3] that we identified as  
28 doubles of existing societies, despite their distinct identifiers: Tokelau (li11, double of li6),  
29 Chilcotin (Na18, double of Nd8) and Ojibwa (Nf1, double of Na34). We then added data for 27  
30 societies in Eurasia to the 1264 EA societies in Gray’s dataset. Data for these societies were  
31 recently coded [4,5], and fill important regional gaps in northern Eurasia.

32  
33 **Cultural variables:** D-PLACE does not included variables from Gray [3] that describe  
34 geography, environment or language, as these data have been extracted for all D-PLACE  
35 societies using contemporary datasets as described in the main paper and following sections.  
36 We do, however, retain four cultural variables that were not part of the original EA but that Gray  
37 included in his Corrected EA [6]. These are Gray’s Political Integration (v90) and Political  
38 succession (v94), which are available for approximately 300 societies each and were first  
39 described and published by Murdock in 1957 as part of his World Ethnographic Sample, a  
40 precursor of the EA [7]; and Trance states (v112) and Societal rigidity (v113) [8,9], for which  
41 data are available for just over 650 and 30 societies, respectively. Each variable name is also  
42 tagged with the description given to it by Murdock, which we felt often contained detail critical to  
43 new users’ understanding of the data. For example, the variable described only as “Fishing” in  
44 Gray [3], is described in Murdock [1] as the dependence of a society on fishing, “including  
45 shellfishing and the pursuit of large aquatic animals”.

46  
47 **Codes:** While we have largely adopted the codes from Gray [3], we have further elaborated  
48 efforts in that revision to make each Murdock prefix and suffix into “stand alone” variables, and  
49 have added codes in cases where we felt missing data were not clearly differentiated from other

50 types of data. For example, a number of variables in Gray [3] that had been modifiers in  
51 Murdock's original EA were coded "9: Same as previous variable" in Gray [3]. We recoded these  
52 cases with the "previous" codes, instead of requiring users to refer to another variable. We also  
53 ungrouped any Murdock codes that were grouped in Gray [3], to minimize loss of information.  
54 For example, in Gray [3], "Prevailing Type of Dwelling: Wall Material (v81)" assigned code "0" to  
55 three Murdock codes: "No walls, or roof and open walls" (Murdock code R), "Walls  
56 indistinguishable from roof" (Murdock code O), and "Missing data" (Murdock code "."). We re-  
57 assigned each of the first two options its own numeric code, to preserve the detail provided by  
58 Murdock. Throughout the dataset, "missing data" was recoded as "NA" from "0". Finally, we  
59 have also returned to the longer code definitions provided by Murdock in his original  
60 publications, as these often include details omitted from the more succinct code definitions in  
61 Gray [3]. These complete code definitions are displayed in results tables, with shortened  
62 definitions' appearing in map and tree legends. All code definitions are also available in the  
63 codebooks we have made available for download on the D-PLACE website.

64  
65 Two other changes to Gray [3] are worth mentioning. First, we identified errors in the focal years  
66 reported in Gray [3] for a number of societies, and therefore replaced Gray's focal year data  
67 (v102) with the focal year reported by Murdock in his original presentation of the society, or,  
68 where missing, by Ember et al. [10]. Second, Murdock (and, therefore, Gray) provided  
69 geographic coordinates for societies rounded to the nearest degree. Because the accuracy of  
70 our environmental data relies on the precision of these coordinates, we used the following  
71 approach to improve the latitude-longitude data for EA societies. First, for societies that were  
72 mapped as falling in the ocean, we manually moved the society's coordinates to the nearest  
73 piece of land, verifying the appropriate island/atoll for small-island nations using online sources  
74 and original ethnographies wherever possible. We used the Global Administrative Areas GADM  
75 v2.6 shapefile for our "land" layer (<http://www.gadm.org>, Last accessed November 2015).

76 Second, we corrected obvious errors for other, non-coastal societies (e.g., societies that were  
77 placed in the wrong hemisphere because of an inverted longitude sign). Environmental data  
78 (see below) were extracted using these revised coordinates. Interested users can identify  
79 societies that had their coordinates revised by comparing a society's "original" latitude and  
80 longitude with its revised latitude and longitude: both are included in CSV downloads of D-  
81 PLACE search results.

82

83 A final strength of the EA dataset as it is presented in D-PLACE is the linking of Murdock's  
84 coding notes with the societies and codes to which they refer. When users download the data,  
85 the comments associated with a given code are readily visible. As White [11], noted:  
86 "[Murdock's] notes provide a wealth of information useful to researchers seeking to dispute  
87 Murdock's codings or to understand his coding decisions." A complete codebook for our revised  
88 EA dataset is available for download on the D-PLACE site. We encourage users interested in  
89 the history of the EA to consult Murdock [7], in which he outlines the rationale used in selecting  
90 societies for the World Ethnographic Sample, a precursor to the EA. In particular, he makes an  
91 argument for including societies that represent "all the culture areas and subareas of the world",  
92 including "examples of recorded ancient civilizations, of the contemporary complex civilizations  
93 of Europe and Asia, of European and African cultures transplanted to other continents, and of  
94 acculturated native peoples on the same basis as indigenous ethnographic cultures" (see also  
95 the introductory sections to the Ethnographic Atlas monograph, Murdock [12]). An accessible  
96 overview of the history of the EA is available through websites maintained by Douglas White  
97 (e.g., [11]).

### 98 **Binford Hunter-Gatherer data**

99 The data were scanned and digitized from tables of coded cultural data published in Binford [13]  
100 (tables 5.01, 6.03, 8.01, 8.04, 8.07, 8.08 and 9.01). As in the case of the EA, we retained only

101 those variables that describe the cultural practices of societies, leaving out ecological  
102 descriptors, as one of the goals of D-PLACE is to provide harmonized, high-quality  
103 environmental data for each society in the database. Where the same variable appeared in  
104 multiple tables, we provide the values that were listed with their source references, rather than  
105 summary values appearing in overview tables. A note on any discrepancy is included in the  
106 'AdminComments' field that accompanies data downloads. Data for focal year, and some  
107 variable names and definitions were obtained from documentation accompanying the  
108 "ENVCALC2" programme [14]. We also exclude most variables that are easily derived from  
109 others in the dataset, or for which definitions could not be ascertained from Binford [13] or from  
110 documentation accompanying ENVCALC2 [14].

111

112 Where Binford provided multiple estimates for a single variable and society (e.g., estimates of  
113 household size at different points in time, in different seasons, or different communities; see  
114 main paper for more discussion), we have included all estimates, tagging each with its 'specific  
115 subcase' information (e.g., with the particular year, season or village to which the estimate  
116 corresponds). We encourage users interested in societies in the Binford dataset to visit the  
117 webpage of Amber L. Johnson [15], which provides additional background on the Binford  
118 Hunter-Gatherer dataset, as well as links to data for additional variables not included in Binford  
119 [13], and not currently in D-PLACE.

120

## 121 **Environmental data:**

122 Geographic coordinates were obtained from the source datasets and revised where needed as  
123 described in the "Cultural data" section, above. Both the original and revised latitude and  
124 longitude are stored for all societies in the society table, and are included in CSV downloads  
125 from the site. For each society, we computed the mean, variance, and predictability of the entire

126 annual cycles of precipitation and temperature based on monthly global maps (0.5 by 0.5  
127 degree cells) obtained from the CRU-TS 3.1 Climate Database [16]. Predictability was  
128 measured via Colwell's [17] Constancy, Contingency and Predictability indexes. These indexes  
129 capture the extent to which yearly cycles vary among years in terms of onset, intensity and  
130 duration, ranging from 0 (completely unpredictable) to 1 (fully predictable). We include  
131 constancy (the extent to which a variable can be predicted because it tends to stay fairly  
132 constant) and contingency (the extent to which predictions are possible because environmental  
133 cycles are highly repeatable) in order to allow interested users to explore the potentially different  
134 impacts of these two types of predictability. Monthly net primary production data were obtained  
135 from the MODIS dataset [18](data range: 2000-2016). From these data we computed the annual  
136 mean, variance predictability, constancy and contingency of net primary productivity at each  
137 sampled locality. Estimates of the number of species at each site were also obtained for birds,  
138 mammals, and amphibians from Jenkins et al. [19] and for vascular plants from Kreft and Jetz  
139 [20]. Ecoregion and biome data were obtained from Olson et al. [21] and elevation data were  
140 obtained from the GTOPO30 data set [22]. Finally, we calculated each society's distance from  
141 the coast in kilometers, using the coastline defined in the full-resolution Global Self-consistent,  
142 Hierarchical, High-resolution Geography Database [23].

143

#### 144 **References**

- 145 1. Murdock GP. Ethnographic Atlas, Installments I-XXVII. *Ethnology*. 1-10.
- 146 2. Barry III H. Ethnographic Atlas XXVIII. *Ethnology*. 1980;19: 245–263.
- 147 3. Gray JP. A corrected ethnographic atlas. *World Cult*. 1999;10: 24–85.
- 148 4. Korotayev A, Kazankov A, Borinskaya S, Khaltourina D, Bondarenko D. Ethnographic  
149 atlas XXX: Peoples of Siberia. *Ethnology*. 2004;43: 83–92.
- 150 5. Bondarenko D, Kazankov A, Khaltourina D, Korotayev A. Ethnographic atlas XXXI:  
151 Peoples of easternmost Europe. *Ethnology*. 2005; 261–289.

- 152 6. Murdock GP, Textor R, Barry III H, White DR, Gray JP, Divale WT. *Ethnographic Atlas*  
153 Revised by World Cultures: EA01-09.SAV (digital file). World Cultures; 1999.
- 154 7. Murdock GP. World Ethnographic Sample. *Am Anthropol.* 1957;59: 664–687.  
155 doi:10.1525/aa.1957.59.4.02a00090
- 156 8. Bourguignon E. *Religion, altered states of consciousness and social change*. Columbus:  
157 Ohio State University Press; 1973.
- 158 9. Greenbaum L. Societal correlates of possession trance in Sub-Saharan Africa. In:  
159 Bourguignon E, editor. *Religion, altered states of consciousness and social change*.  
160 Columbus: Ohio State University Press; 1973. pp. 39–57.
- 161 10. Ember CR, Page H, Martin MM, O’Leary T. A computerized concordance of cross-cultural  
162 samples. New Haven: Human Relations Area Files; 1992.
- 163 11. White DR. *Ethnographic Atlas* [Internet]. Available:  
164 <http://eclectic.ss.uci.edu/~drwhite/worldcul/atlas.htm>
- 165 12. Murdock GP. *Ethnographic Atlas XXII: A Summary*. Pittsburgh: University of Pittsburgh  
166 Press; 1967.
- 167 13. Binford LR. *Constructing frames of reference: an analytical method for archaeological*  
168 *theory building using ethnographic and environmental data sets*. Univ of California Press;  
169 2001.
- 170 14. Binford LR, Johnson AL. *Documentation for Program for Calculating Environmental and*  
171 *Hunter-Gatherer Frames of Reference (ENVCALC2)*. Java version [Internet]. 2006.  
172 Available: <http://www.mae.u-paris10.fr/arscan/Bases-de-donnees-ethnographique-et.html>
- 173 15. Johnson AL. *Data and program: Binford’s environmental and hunter-gatherer frames of*  
174 *reference variables* [Internet]. Available: [http://ajohnson.sites.truman.edu/data-and-](http://ajohnson.sites.truman.edu/data-and-program/)  
175 [program/](http://ajohnson.sites.truman.edu/data-and-program/)
- 176 16. Harris I, Jones PD, Osborn TJ, Lister DH. Updated high resolution grids of monthly  
177 climatic observations—the CRU TS3. 10 Dataset. *Int J Climatol.* 2014;34: 623–642.

- 178 17. Colwell RK. Predictability, constancy, and contingency of periodic phenomena. *Ecology*.  
179 1974; 1148–1153.
- 180 18. NASA. Net Primary Productivity (1 month - TERRA/MODIS) [Internet]. Available:  
181 [http://neo.sci.gsfc.nasa.gov/view.php?datasetId=MOD17A2\\_M\\_PSN](http://neo.sci.gsfc.nasa.gov/view.php?datasetId=MOD17A2_M_PSN)
- 182 19. Jenkins CN, Pimm SL, Joppa LN. Global patterns of terrestrial vertebrate diversity and  
183 conservation. *Proc Natl Acad Sci*. 2013;110: E2602–E2610.
- 184 20. Kreft H, Jetz W. Global patterns and determinants of vascular plant diversity. *Proc Natl*  
185 *Acad Sci*. 2007;104: 5925–5930.
- 186 21. Olson DM, Dinerstein E, Wikramanayake ED, Burgess ND, Powell GVN, Underwood EC,  
187 et al. Terrestrial Ecoregions of the World: A New Map of Life on Earth A new global map  
188 of terrestrial ecoregions provides an innovative tool for conserving biodiversity.  
189 *Bioscience*. 2001;51: 933–938.
- 190 22. LP DAAC (Land Processes Distributed Active Archive Center) USGS/EROS. Global 30  
191 arc-second elevation (GTOPO30): Long-term archive [Internet]. Available:  
192 <https://lta.cr.usgs.gov/GTOPO30>
- 193 23. Wessel P, Smith, W. H. F. Global Self-consistent, Hierarchical, High-resolution  
194 Geography Database (GSHHS) v2.3.4 [Internet]. 2015. Available:  
195 <https://www.ngdc.noaa.gov/mgg/shorelines/gshhs.html>  
196
