# Supplementary material for: D-PLACE: A Global Database of Cultural, Linguistic and Environmental Diversity
Source: PubMed Central journal article supplement (PMC4938595; doi:10.1371/journal.pone.0158391), 2016-07-08
Supplement: pone.0158391.s003.pdf [file pone.0158391.s003.pdf]

**S1 Table. D-PLACE societies per language family. Currently, D-PLACE contains cultural data for over 1400 societies, drawn from two major cross-cultural datasets (the Ethnographic Atlas and Binford Hunter-Gatherer datasets). The societies are associated with 1202 unique languages and approximately 1315 dialects. Linguistic information for each society is available for download through D-PLACE, with all languages and dialects linked to Glottolog identifiers ([glottolog.org](http://glottolog.org)).**

| Language family            | Societies in Ethnographic Atlas dataset | Societies in Binford Hunter-Gatherer dataset | Unique languages | Unique dialects |
|----------------------------|-----------------------------------------|----------------------------------------------|------------------|-----------------|
| Abkhaz-Adyge               | 2                                       | 0                                            | 2                | 2               |
| Afro-Asiatic               | 104                                     | 0                                            | 72               | 91              |
| Ainu                       | 1                                       | 1                                            | 1                | 1               |
| Algic                      | 31                                      | 26                                           | 26               | 32              |
| Alsea                      | 1                                       | 1                                            | 1                | 1               |
| Amerindian pidgin (Pidgin) | 1                                       | 0                                            | 1                | 1               |
| Araucanian                 | 1                                       | 0                                            | 1                | 1               |
| Arawakan                   | 13                                      | 1                                            | 13               | 13              |
| Athapaskan-Eyak-Tlingit    | 31                                      | 33                                           | 33               | 33              |
| Atlantic-Congo             | 312                                     | 5                                            | 291              | 313             |
| Austroasiatic              | 15                                      | 3                                            | 16               | 17              |
| Austronesian               | 131                                     | 8                                            | 129              | 135             |
| Aymara                     | 1                                       | 0                                            | 1                | 1               |
| Banaro                     | 1                                       | 0                                            | 1                | 1               |
| Barbacoan                  | 1                                       | 0                                            | 1                | 1               |
| Basque                     | 2                                       | 0                                            | 1                | 2               |
| Bookkeeping                | 1                                       | 0                                            | 1                | 1               |
| Bororoan                   | 2                                       | 1                                            | 2                | 2               |
| Burushaski                 | 1                                       | 0                                            | 1                | 1               |
| Caddoan                    | 5                                       | 0                                            | 4                | 4               |
| Cariban                    | 14                                      | 1                                            | 12               | 15              |
| Central Sudanic            | 14                                      | 1                                            | 14               | 15              |
| Chibchan                   | 7                                       | 0                                            | 7                | 7               |
| Chimakuan                  | 1                                       | 1                                            | 1                | 1               |
| Chimariko                  | 1                                       | 1                                            | 1                | 1               |
| Chinookan                  | 2                                       | 2                                            | 2                | 2               |
| Chitimacha                 | 1                                       | 0                                            | 1                | 1               |
| Chocoan                    | 1                                       | 0                                            | 1                | 1               |
| Chonan                     | 2                                       | 2                                            | 2                | 2               |
| Chono                      | 0                                       | 1                                            | 1                | 1               |

| Language family     | Societies in<br>Ethnographic<br>Atlas dataset | Societies<br>in Binford<br>Hunter-<br>Gatherer<br>dataset | Unique<br>languages | Unique<br>dialects |
|---------------------|-----------------------------------------------|-----------------------------------------------------------|---------------------|--------------------|
| Chukotko-Kamchatkan | 3                                             | 0                                                         | 3                   | 3                  |
| Chumashan           | 1                                             | 1                                                         | 1                   | 1                  |
| Coahuilteco         | 1                                             | 1                                                         | 1                   | 1                  |
| Cochimi-Yuman       | 12                                            | 4                                                         | 7                   | 9                  |
| Coosan              | 1                                             | 1                                                         | 1                   | 1                  |
| Dizoid              | 1                                             | 0                                                         | 1                   | 1                  |
| Dogon               | 1                                             | 0                                                         | 1                   | 1                  |
| Dravidian           | 12                                            | 6                                                         | 16                  | 17                 |
| East Kutubu         | 1                                             | 0                                                         | 1                   | 1                  |
| Eastern Jebel       | 1                                             | 0                                                         | 1                   | 1                  |
| Eastern Trans-Fly   | 1                                             | 0                                                         | 1                   | 1                  |
| Eskimo-Aleut        | 17                                            | 27                                                        | 9                   | 23                 |
| Furan               | 1                                             | 0                                                         | 1                   | 1                  |
| Gagadu              | 0                                             | 1                                                         | 1                   | 1                  |
| Goilalan            | 1                                             | 0                                                         | 1                   | 1                  |
| Great Andamanese    | 1                                             | 1                                                         | 1                   | 1                  |
| Guahibo             | 1                                             | 1                                                         | 1                   | 1                  |
| Guaicurian          | 0                                             | 1                                                         | 1                   | 1                  |
| Guaicuruan          | 3                                             | 0                                                         | 3                   | 3                  |
| Guató               | 1                                             | 1                                                         | 1                   | 1                  |
| Gunwinyguan         | 1                                             | 3                                                         | 3                   | 3                  |
| Hadza               | 1                                             | 1                                                         | 1                   | 1                  |
| Haida               | 1                                             | 1                                                         | 1                   | 1                  |
| Heiban              | 5                                             | 0                                                         | 5                   | 5                  |
| Hmong-Mien          | 2                                             | 0                                                         | 2                   | 2                  |
| Huavean             | 1                                             | 0                                                         | 1                   | 1                  |
| Huitotoan           | 1                                             | 0                                                         | 1                   | 1                  |
| Ijoid               | 1                                             | 0                                                         | 1                   | 1                  |
| Indo-European       | 57                                            | 1                                                         | 50                  | 57                 |
| Iroquoian           | 3                                             | 0                                                         | 3                   | 3                  |
| Japonic             | 4                                             | 0                                                         | 4                   | 4                  |
| Jarawa-Onge         | 0                                             | 2                                                         | 2                   | 2                  |
| Jarrakan            | 0                                             | 1                                                         | 1                   | 1                  |
| Jicaquean           | 1                                             | 0                                                         | 1                   | 1                  |
| Jivaroan            | 1                                             | 0                                                         | 1                   | 1                  |
| Kadugli-Krongo      | 2                                             | 0                                                         | 2                   | 2                  |
| Kakua-Nukak         | 0                                             | 1                                                         | 1                   | 1                  |
| Karankawa           | 1                                             | 1                                                         | 1                   | 1                  |

| Language family   | Societies in Ethnographic Atlas dataset | Societies in Binford Hunter-Gatherer dataset | Unique languages | Unique dialects |
|-------------------|-----------------------------------------|----------------------------------------------|------------------|-----------------|
| Karok             | 1                                       | 1                                            | 1                | 1               |
| Kartvelian        | 3                                       | 0                                            | 2                | 3               |
| Kawesqar          | 1                                       | 1                                            | 1                | 1               |
| Keresan           | 6                                       | 0                                            | 2                | 5               |
| Khoe-Kwadi        | 3                                       | 5                                            | 6                | 7               |
| Kiowa-Tanoan      | 8                                       | 1                                            | 5                | 7               |
| Kiwaian           | 1                                       | 0                                            | 1                | 1               |
| Klamath-Modoc     | 2                                       | 2                                            | 1                | 1               |
| Koiarian          | 2                                       | 0                                            | 2                | 2               |
| Kolopom           | 1                                       | 0                                            | 1                | 1               |
| Koman             | 1                                       | 0                                            | 1                | 1               |
| Koreanic          | 1                                       | 0                                            | 1                | 1               |
| Kunama            | 1                                       | 0                                            | 1                | 1               |
| Kutenai           | 1                                       | 1                                            | 1                | 1               |
| Kwerbic           | 2                                       | 0                                            | 2                | 2               |
| Kxa               | 1                                       | 2                                            | 2                | 2               |
| Laragia           | 0                                       | 1                                            | 1                | 1               |
| Lencan            | 1                                       | 0                                            | 1                | 1               |
| Lengua-Mascoy     | 1                                       | 0                                            | 1                | 1               |
| Lower Sepik-Ramu  | 1                                       | 0                                            | 1                | 1               |
| Maiduan           | 2                                       | 2                                            | 2                | 2               |
| Mailuan           | 1                                       | 0                                            | 1                | 1               |
| Mande             | 23                                      | 0                                            | 22               | 23              |
| Maningrida        | 1                                       | 2                                            | 1                | 2               |
| Mao               | 1                                       | 0                                            | 1                | 1               |
| Marind            | 1                                       | 0                                            | 1                | 1               |
| Matacoan          | 2                                       | 0                                            | 2                | 2               |
| Mayan             | 10                                      | 0                                            | 10               | 10              |
| Misumalpan        | 1                                       | 0                                            | 1                | 1               |
| Miwok-Costanoan   | 2                                       | 3                                            | 3                | 3               |
| Mixe-Zoque        | 2                                       | 0                                            | 2                | 2               |
| Mongolic          | 7                                       | 0                                            | 7                | 7               |
| Morehead-Wasur    | 1                                       | 0                                            | 1                | 1               |
| Muskogean         | 4                                       | 0                                            | 4                | 4               |
| Nakh-Daghestanian | 1                                       | 0                                            | 1                | 1               |
| Nambiquaran       | 1                                       | 1                                            | 1                | 1               |
| Nara              | 1                                       | 0                                            | 1                | 1               |
| Narrow Talodi     | 1                                       | 0                                            | 1                | 1               |

| Language family          | Societies in Ethnographic Atlas dataset | Societies in Binford Hunter-Gatherer dataset | Unique languages | Unique dialects |
|--------------------------|-----------------------------------------|----------------------------------------------|------------------|-----------------|
| Natchez                  | 1                                       | 0                                            | 1                | 1               |
| Ndu                      | 2                                       | 0                                            | 2                | 2               |
| Nilotic                  | 32                                      | 1                                            | 27               | 32              |
| Nivkh                    | 1                                       | 1                                            | 1                | 1               |
| North Halmahera          | 1                                       | 0                                            | 1                | 1               |
| North-Eastern Tasmanian  | 1                                       | 1                                            | 1                | 1               |
| Northern Daly            | 0                                       | 1                                            | 1                | 1               |
| Nubian                   | 3                                       | 0                                            | 3                | 3               |
| Nuclear Eleman           | 1                                       | 0                                            | 1                | 1               |
| Nuclear Torricelli       | 1                                       | 0                                            | 1                | 1               |
| Nuclear Trans New Guinea | 11                                      | 0                                            | 11               | 11              |
| Nuclear-Macro-Je         | 8                                       | 2                                            | 8                | 8               |
| Nyimang                  | 1                                       | 0                                            | 1                | 1               |
| Otomanguean              | 6                                       | 1                                            | 6                | 6               |
| Páez                     | 1                                       | 0                                            | 1                | 1               |
| Palaihnihan              | 2                                       | 2                                            | 2                | 2               |
| Pama-Nyungan             | 8                                       | 40                                           | 39               | 40              |
| Panoan                   | 3                                       | 0                                            | 3                | 3               |
| Peba-Yagua               | 1                                       | 0                                            | 1                | 1               |
| Pomoan                   | 3                                       | 4                                            | 3                | 3               |
| Pumé                     | 1                                       | 1                                            | 1                | 1               |
| Purari                   | 1                                       | 0                                            | 1                | 1               |
| Quechuan                 | 1                                       | 0                                            | 1                | 1               |
| Sahaptian                | 4                                       | 4                                            | 4                | 4               |
| Saharan                  | 4                                       | 0                                            | 4                | 4               |
| Saliban                  | 1                                       | 0                                            | 1                | 1               |
| Salinan                  | 1                                       | 1                                            | 1                | 1               |
| Salishan                 | 21                                      | 22                                           | 18               | 21              |
| Sandawe                  | 1                                       | 0                                            | 1                | 1               |
| Sepik                    | 1                                       | 0                                            | 1                | 1               |
| Seri                     | 1                                       | 1                                            | 1                | 1               |
| Shastan                  | 1                                       | 1                                            | 1                | 1               |
| Shom Peng                | 0                                       | 1                                            | 1                | 1               |
| Sino-Tibetan             | 30                                      | 0                                            | 30               | 30              |
| Siouan                   | 12                                      | 3                                            | 10               | 12              |
| Siuslaw                  | 1                                       | 0                                            | 1                | 1               |
| Songhay                  | 2                                       | 0                                            | 2                | 2               |
| South Bougainville       | 1                                       | 0                                            | 1                | 1               |

| Language family         | Societies in Ethnographic Atlas dataset | Societies in Binford Hunter-Gatherer dataset | Unique languages | Unique dialects |
|-------------------------|-----------------------------------------|----------------------------------------------|------------------|-----------------|
| South Omotic            | 6                                       | 0                                            | 3                | 3               |
| South-Eastern Tasmanian | 0                                       | 1                                            | 1                | 1               |
| Southern Daly           | 1                                       | 0                                            | 1                | 1               |
| Surmic                  | 3                                       | 0                                            | 3                | 3               |
| Ta-Ne-Omotic            | 2                                       | 0                                            | 2                | 2               |
| Tai-Kadai               | 1                                       | 1                                            | 1                | 1               |
| Takelma                 | 9                                       | 0                                            | 7                | 8               |
| Tangkic                 | 0                                       | 2                                            | 2                | 2               |
| Tarascan                | 1                                       | 0                                            | 1                | 1               |
| Tequistlatecan          | 1                                       | 0                                            | 1                | 1               |
| Ticuna-Yuri             | 1                                       | 0                                            | 1                | 1               |
| Timucua                 | 1                                       | 0                                            | 1                | 1               |
| Tiwi                    | 1                                       | 1                                            | 1                | 1               |
| Totonacan               | 1                                       | 0                                            | 1                | 1               |
| Trumai                  | 1                                       | 0                                            | 1                | 1               |
| Tsimshian               | 1                                       | 2                                            | 2                | 2               |
| Tucanoan                | 2                                       | 0                                            | 2                | 2               |
| Tungusic                | 8                                       | 1                                            | 9                | 9               |
| Tupian                  | 11                                      | 4                                            | 14               | 14              |
| Turkic                  | 13                                      | 0                                            | 12               | 13              |
| Tuu                     | 1                                       | 4                                            | 4                | 4               |
| Unclassifiable          | 0                                       | 1                                            | 1                | 1               |
| Uralic                  | 17                                      | 1                                            | 16               | 17              |
| Uru-Chipaya             | 1                                       | 0                                            | 1                | 1               |
| Uto-Aztecan             | 65                                      | 46                                           | 22               | 29              |
| Wakashan                | 5                                       | 5                                            | 5                | 5               |
| Warao                   | 1                                       | 0                                            | 1                | 1               |
| Washo                   | 1                                       | 1                                            | 1                | 1               |
| Wintuan                 | 3                                       | 3                                            | 3                | 2               |
| Worroran                | 0                                       | 2                                            | 2                | 2               |
| Yámana                  | 1                                       | 1                                            | 1                | 1               |
| Yana                    | 1                                       | 1                                            | 1                | 1               |
| Yanomam                 | 4                                       | 1                                            | 4                | 4               |
| Yele                    | 1                                       | 0                                            | 1                | 1               |
| Yeniseian               | 1                                       | 1                                            | 1                | 1               |
| Yokutsan                | 3                                       | 3                                            | 2                | 3               |
| Yuchi                   | 1                                       | 0                                            | 1                | 1               |
| Yukaghir                | 1                                       | 1                                            | 1                | 1               |

| <b>Language family</b> | <b>Societies in<br/>Ethnographic<br/>Atlas dataset</b> | <b>Societies<br/>in Binford<br/>Hunter-<br/>Gatherer<br/>dataset</b> | <b>Unique<br/>languages</b> | <b>Unique<br/>dialects</b> |
|------------------------|--------------------------------------------------------|----------------------------------------------------------------------|-----------------------------|----------------------------|
| <b>Yuki-Wappo</b>      | 4                                                      | 3                                                                    | 2                           | 2                          |
| <b>Zamucoan</b>        | 1                                                      | 0                                                                    | 1                           | 1                          |
| <b>Zuni</b>            | 1                                                      | 0                                                                    | 1                           | 1                          |
| <b>Total</b>           | 1291                                                   | 339                                                                  | 1202                        | 1315                       |
